# Supplementary material for: Yields and resilience outcomes of organic, cover crop, and conventional practices in a Mediterranean climate
Source: PubMed Central journal article supplement (PMC6706438; doi:10.1038/s41598-019-48747-4), 2019-08-22
Supplement: 41598_2019_48747_MOESM1_ESM.pdf [file 41598_2019_48747_MOESM1_ESM.pdf]

Supplementary information for:

**Yields and resilience outcomes of organic, cover crop, and conventional practices in a  
Mediterranean climate**

Meng Li<sup>1</sup>, Caitlin A. Peterson<sup>1</sup>, Nicole E. Tautges<sup>2</sup>, Kate M. Scow<sup>3</sup>, and Amélie C. M. Gaudin<sup>1, \*</sup>

<sup>1</sup> Department of Plant Sciences, University of California, Davis, One Shields Avenue, Davis, CA  
95616, United States

<sup>2</sup> Agricultural Sustainability Institute, University of California, Davis, One Shields Avenue,  
Davis, CA 95616, United States

<sup>3</sup> Department of Land, Air, and Water Resources, University of California, Davis, One Shields  
Avenue, Davis, CA 95616, United States

\* Corresponding author: [agaudin@ucdavis.edu](mailto:agaudin@ucdavis.edu)

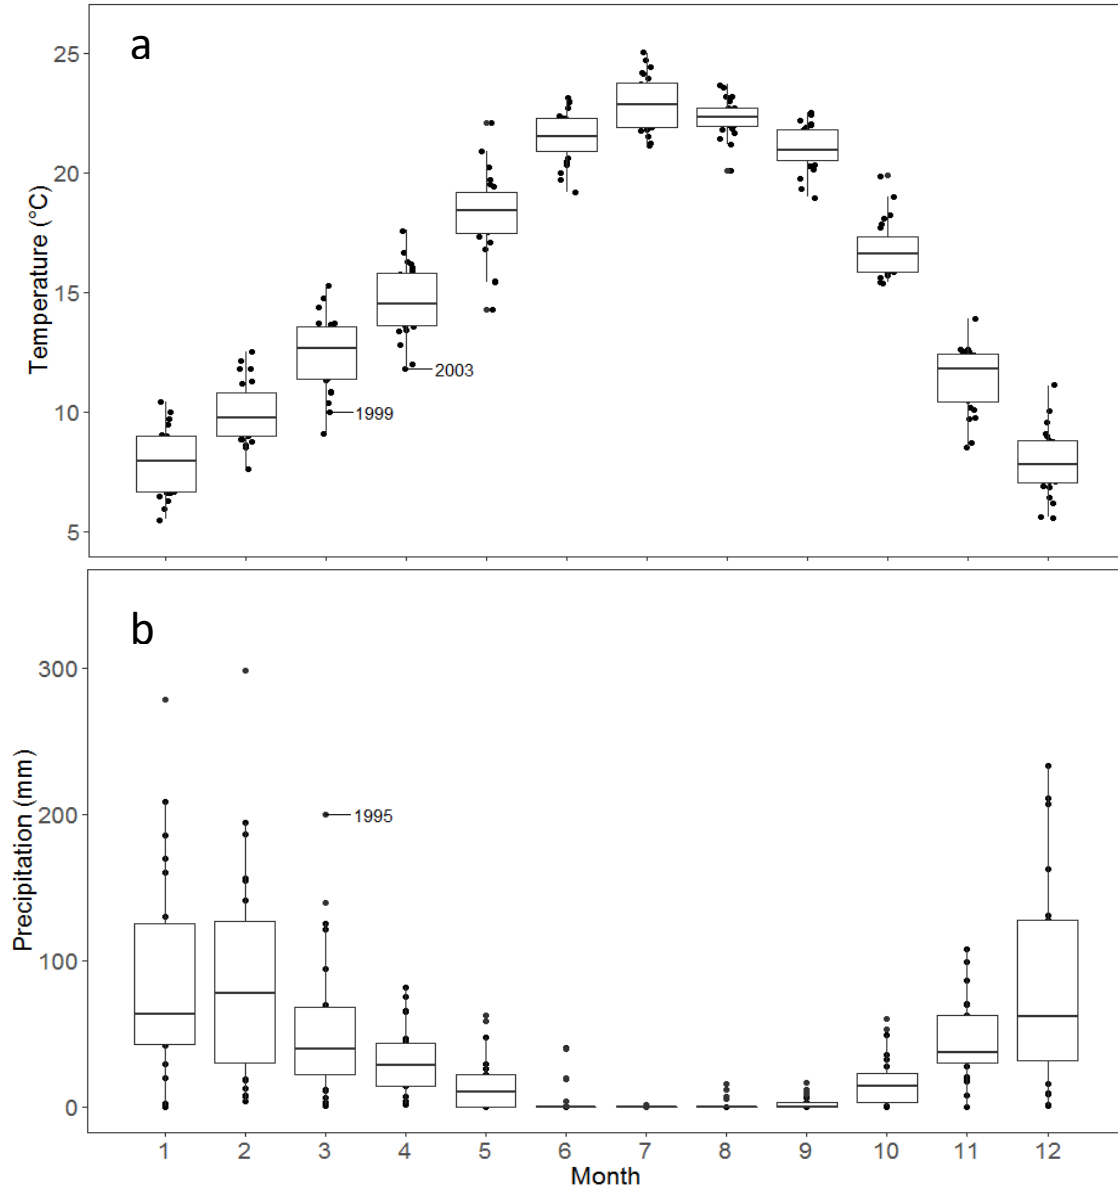

Supplementary Figure S1. Monthly average environmental conditions at the experimental site.

(a) Monthly air temperature and (b) precipitation are shown for the period of 1994-2017.

Supplementary Table S1. Information of crop variety, nitrogen (N) inputs, and winter cover crops in conventional maize-tomato (CONV), maize-tomato with winter cover crop (CONV+WCC), and organic maize-tomato system (ORG) from 1994 to 2017.

| Year | Tomato            |                   |                  |                                |          |       |                   |                 |
|------|-------------------|-------------------|------------------|--------------------------------|----------|-------|-------------------|-----------------|
|      | Crop Variety      |                   |                  | N input (kg ha <sup>-1</sup> ) |          |       | Winter cover crop |                 |
|      | CONV              | CONV+WCC          | ORG              | CONV                           | CONV+WCC | ORG   | CONV+WCC          | ORG             |
| 1994 | Hailey 3155       | Hailey 3155       | Hailey 3155      | 135.7                          | 135.7    | 179.3 | NA                | Legume          |
| 1995 | Hailey 3155       | Hailey 3155       | Hailey 3155      | 237.3                          | 237.3    | 201.8 | NA                | Legume          |
| 1996 | Hailey 3155       | Hailey 3155       | Hailey 3155      | 159.3                          | 159.3    | 134.5 | NA                | Legume          |
| 1997 | Hailey 3155       | Hailey 3155       | Hailey 3155      | 161.7                          | 161.7    | 179.3 | NA                | Legume          |
| 1998 | Hailey 3155       | Hailey 3155       | Hailey 3155      | 159.4                          | 159.4    | NA    | NA                | Legume          |
| 1999 | Hailey 3155       | Hailey 3155       | Hailey 3155      | 113.2                          | 113.2    | NA    | NA                | Legume          |
| 2000 | Hailey 3155       | Hailey 3155       | Hailey 3155      | 158.4                          | 158.4    | 179.3 | NA                | Legume          |
| 2001 | Hailey 3155       | Hailey 3155       | Hailey 3155      | 158.4                          | 158.4    | 179.3 | NA                | Legume          |
| 2002 | Hailey 3155       | Hailey 3155       | Hailey 3155      | 162.6                          | 162.6    | 179.3 | NA                | Legume          |
| 2003 | Hailey 3155       | Hailey 3155       | Hailey 3155      | 168.2                          | 168.2    | 179.3 | NA                | Legume          |
| 2004 | Hailey 3155       | Hailey 3155       | Hailey 3155      | 162.6                          | 50.4     | 179.3 | Legume            | Legume          |
| 2005 | Heinz 9780        | Heinz 9780        | Heinz 9780       | 162.6                          | 50.4     | 179.3 | Legume            | Legume          |
| 2006 | Heinz 9780        | Heinz 9780        | Heinz 9780       | 162.6                          | 50.4     | 179.3 | Legume + Cereal   | Legume + Cereal |
| 2007 | Heinz 9780        | Heinz 9780        | Heinz 9780       | 162.6                          | 50.4     | 179.3 | Legume + Cereal   | Legume + Cereal |
| 2008 | Heinz 9780        | NA                | Heinz 9780       | 162.6                          | NA       | 179.3 | Legume + Cereal   | Legume + Cereal |
| 2009 | Heinz 9780        | Heinz 9780        | Heinz 9780       | 162.6                          | 162.6    | 179.3 | Legume + Cereal   | Legume + Cereal |
| 2010 | Heinz 9780        | Heinz 9780        | Heinz 9780       | 162.5                          | 162.5    | 179.3 | Legume + Cereal   | Legume + Cereal |
| 2011 | Heinz 9780        | Heinz 9780        | Heinz 9780       | 162.5                          | 162.5    | 179.3 | Legume + Cereal   | Legume + Cereal |
| 2012 | Heinz 9780        | Heinz 9780        | Heinz 9780       | 162.5                          | 162.5    | 179.3 | Legume + Cereal   | Legume + Cereal |
| 2013 | Heinz 8504, conv. | Heinz 8504, conv. | Heinz 8504, org. | 134.5                          | 134.5    | 179.3 | Legume + Cereal   | Legume + Cereal |
| 2014 | Heinz 8504, conv. | Heinz 8504, conv. | Heinz 8504, org. | 200.0                          | 200.0    | 179.3 | Legume + Cereal   | Legume + Cereal |
| 2015 | Heinz 8504, conv. | Heinz 8504, conv. | Heinz 8504, org. | 200.0                          | 200.0    | 179.3 | Legume + Cereal   | Legume + Cereal |
| 2016 | Heinz 8504, conv. | Heinz 8504, conv. | Heinz 8504, org. | 200.0                          | 200.0    | 179.3 | Legume + Cereal   | Legume + Cereal |
| 2017 | Heinz 8504, conv. | Heinz 8504, conv. | Heinz 8504, org. | 200.0                          | 200.0    | 179.3 | Legume + Cereal   | Legume + Cereal |

Supplementary Table S1. Continued.

| Year | Maize         |               |                           |                                |          |       |                   |                 |
|------|---------------|---------------|---------------------------|--------------------------------|----------|-------|-------------------|-----------------|
|      | Crop Variety  |               |                           | N input (kg ha <sup>-1</sup> ) |          |       | Winter cover crop |                 |
|      | CONV          | CONV+WCC      | ORG                       | CONV                           | CONV+WCC | ORG   | CONV+WCC          | ORG             |
| 1994 | Pioneer 3162  | NC +4616      | NC +4616                  | 314.4                          | 0.0      | 358.7 | Legume            | Legume          |
| 1995 | NC +4616      | NC +4616      | NC +4616                  | 280.8                          | 0.0      | 538.0 | Legume            | Legume          |
| 1996 | Pioneer 3162  | NC +4616      | NC +4616                  | 235.5                          | 0.0      | 394.5 | Legume            | Legume          |
| 1997 | Pioneer 3162  | NC +4616      | NC +4616                  | 243.2                          | 0.0      | 313.8 | Legume            | Legume          |
| 1998 | Pioneer 3162  | NC +4616      | NC +4616                  | 225.7                          | 0.0      | NA    | Legume            | Legume          |
| 1999 | NC +4616      | NC +4616      | NC +4616                  | 228.9                          | 0.0      | NA    | Legume            | Legume          |
| 2000 | Pioneer 3162  | NC +4616      | NC +4616                  | 243.7                          | 0.0      | 179.3 | Legume            | Legume          |
| 2001 | Pioneer 3162  | NC +4616      | NC +4616                  | 225.7                          | 0.0      | 179.3 | Legume            | Legume          |
| 2002 | Pioneer 3162  | NC +4616      | NC +4616                  | 218.5                          | 0.0      | 179.3 | Legume            | Legume          |
| 2003 | ST7570RR      | ST7570RR      | ST7570                    | 235.5                          | 0.0      | 179.3 | Legume            | Legume          |
| 2004 | ST7570RR      | ST7570RR      | ST7570                    | 235.5                          | 0.0      | 179.3 | Legume            | Legume          |
| 2005 | ST7570RR      | ST7570RR      | ST7570                    | 235.5                          | 0.0      | 179.3 | Legume            | Legume          |
| 2006 | ST7570RR      | ST7570RR      | ST7570                    | 235.5                          | 0.0      | 179.3 | Legume + Cereal   | Legume + Cereal |
| 2007 | ST7570RR      | ST7570RR      | ST7570                    | 235.5                          | 0.0      | 179.3 | Legume + Cereal   | Legume + Cereal |
| 2013 | Nutech 0A-717 | Nutech 0A-717 | Blue River hybrids, 76H50 | 235.5                          | 235.5    | 179.3 | Legume + Cereal   | Legume + Cereal |
| 2014 | Nutech 0A-717 | Nutech 0A-717 | Blue River hybrids, 76H50 | 235.5                          | 235.5    | 179.3 | Legume + Cereal   | Legume + Cereal |
| 2015 | Nutech 0A-717 | Nutech 0A-717 | Blue River hybrids, 76H50 | 235.5                          | 235.5    | 179.3 | Legume + Cereal   | Legume + Cereal |
| 2016 | Nutech 0A-717 | Nutech 0A-717 | Blue River hybrids, 76H50 | 235.5                          | 235.5    | 179.3 | Legume + Cereal   | Legume + Cereal |
| 2017 | Nutech 0A-717 | Nutech 0A-717 | Blue River hybrids, 76H50 | 235.5                          | 235.5    | 179.3 | Legume + Cereal   | Legume + Cereal |

Supplementary Table S2. Analysis of variance for the yield of tomato and maize as predicted by system, year, and their interaction.

| Crop   | Year      | Source        | Degree of freedom | F-value | P-value |
|--------|-----------|---------------|-------------------|---------|---------|
| Tomato | 1994-2017 | System        | 2                 | 0.616   | 0.541   |
|        |           | Year          | 1                 | 244.902 | <0.001  |
|        |           | System * Year | 2                 | 7.591   | <0.001  |
| Maize  | 1994-2007 | System        | 2                 | 167.553 | <0.001  |
|        |           | Year          | 1                 | 64.733  | <0.001  |
|        |           | System * Year | 2                 | 16.553  | <0.001  |
|        | 2012-2017 | System        | 2                 | 22.830  | <.001   |
|        |           | Year          | 1                 | 0.019   | 0.891   |
|        |           | System * Year | 2                 | 1.414   | 0.256   |

Supplementary Table S3. Yield trends of tomato and maize in years with no variety change in conventional maize-tomato (CONV), maize-tomato with winter cover crop (CONV+WCC), and organic maize-tomato system (ORG) from 1994 to 2017.

| Crop   | Year      | System   | Yield trends                   |         |
|--------|-----------|----------|--------------------------------|---------|
|        |           |          | (Mg ha <sup>-1</sup> per year) | P-value |
| Tomato | 1994-2004 | ORG      | 1.150                          | 0.060   |
|        |           | CONV+WCC | 0.320                          | 0.710   |
|        |           | CONV     | 1.620                          | 0.114   |
|        | 2005-2012 | ORG      | 2.250                          | 0.030   |
|        |           | CONV+WCC | 8.840                          | <0.001  |
|        |           | CONV     | 0.270                          | 0.660   |
|        | 2013-2017 | ORG      | -1.611                         | 0.515   |
|        |           | CONV+WCC | 4.052                          | 0.446   |
|        |           | CONV     | 2.767                          | 0.286   |
| Maize  | 1994-2002 | ORG      | -0.405                         | 0.001   |
|        |           | CONV+WCC | -0.120                         | 0.110   |
|        |           | CONV     | 0.090                          | 0.470   |
|        | 2003-2007 | ORG      | 0.027                          | 0.946   |
|        |           | CONV+WCC | -0.600                         | 0.013   |
|        |           | CONV     | -0.280                         | 0.390   |
